# Supplementary material for: Promising anticancer mono- and dinuclear ruthenium(iii) dithiocarbamato complexes: systematic solution studies
Source: Royal Society of Chemistry journal article supplement (doi:10.1039/c1dt11504a), 2011-01-01
Supplement: c1dt11504a.pdf [file c1dt11504a.pdf]

## Electronic Supplementary Information

of

### Promising Anticancer Mono- and Dinuclear Ruthenium(III) Dithiocarbamate

### Complexes: Systematic Solution Studies

by Eszter M. Nagy, Chiara Nardon, Lorena Giovagnini, Luciano Marchiò, Andrea Trevisan,  
and Dolores Fregona\*

#### Table of Contents:

**Table S1.** Selected geometric parameters of [Ru(DMDT)<sub>3</sub>].

**Table S2.** Selected geometric parameters of [Ru(PDT)<sub>3</sub>]·CHCl<sub>3</sub>.

**Table S3.** Selected geometric parameters of [Ru(ESDT)<sub>3</sub>].

**Table S4.** UV-visible spectral data for BSA in the presence of dimethyl sulfoxide, [Ru(ESDT)<sub>3</sub>] and α-[Ru<sub>2</sub>(ESDT)<sub>5</sub>]Cl complexes in phosphate buffered saline solution.

**Figure S1.** UV-visible spectra of [Ru(ESDT)<sub>3</sub>] in DMEM growth medium.

**Figure S2.** UV-visible spectra of BSA in phosphate buffered saline with dimethyl sulfoxide.

**Figure S3.** UV-visible spectra of [Ru(ESDT)<sub>3</sub>] in phosphate buffered saline with BSA.

**Figure S4.** UV-visible spectra of α-[Ru<sub>2</sub>(ESDT)<sub>5</sub>] in phosphate buffered saline with BSA.

**Figure S5.** UV-visible spectra of [Ru(ESDT)<sub>3</sub>] with BSA in phosphate buffered saline (5:1 BSA:complex ratio followed for 48 h).

**Figure S6.** UV-visible spectra of α-[Ru<sub>2</sub>(ESDT)<sub>5</sub>] in phosphate buffered saline (5:1 BSA:complex ratio followed for 48 h).

**Figure S7.** CD spectra of BSA in phosphate buffered saline with dimethyl sulfoxide.

**Figure S8.** CD spectra of BSA in phosphate buffered saline with [Ru(ESDT)<sub>3</sub>] after 24 h.

**Figure S9.** CD spectra of BSA in phosphate buffered saline with α-[Ru<sub>2</sub>(ESDT)<sub>5</sub>]Cl after 24 h.

**Table S1.** Selected bond lengths (Å) and angles (°) for [Ru(DMDT)<sub>3</sub>].

|             |           |                |           |
|-------------|-----------|----------------|-----------|
| Ru-S(23)    | 2.3789(7) | S(23)-Ru-S(13) | 73.16(2)  |
| Ru-S(13)    | 2.3852(7) | S(23)-Ru-S(21) | 98.64(3)  |
| Ru-S(21)    | 2.3852(7) | S(13)-Ru-S(21) | 95.30(3)  |
| Ru-S(22)    | 2.3876(7) | S(23)-Ru-S(22) | 166.06(3) |
| Ru-S(12)    | 2.3888(8) | S(13)-Ru-S(22) | 98.72(3)  |
| Ru-S(11)    | 2.3976(7) | S(21)-Ru-S(22) | 93.31(3)  |
| S(11)-C(11) | 1.720(2)  | S(23)-Ru-S(12) | 96.87(3)  |
| S(21)-C(11) | 1.714(2)  | S(13)-Ru-S(12) | 99.14(3)  |
| S(23)-C(13) | 1.714(2)  | S(21)-Ru-S(12) | 161.31(3) |
| S(22)-C(12) | 1.702(3)  | S(22)-Ru-S(12) | 72.86(3)  |
| S(13)-C(13) | 1.719(2)  | S(23)-Ru-S(11) | 93.30(3)  |
| S(12)-C(12) | 1.711(3)  | S(13)-Ru-S(11) | 160.80(2) |
| N(11)-C(11) | 1.324(3)  | S(21)-Ru-S(11) | 72.89(2)  |
| N(11)-C(21) | 1.457(3)  | S(22)-Ru-S(11) | 97.07(3)  |
| N(11)-C(31) | 1.462(3)  | S(12)-Ru-S(11) | 95.91(3)  |
| C(13)-N(13) | 1.318(3)  | C(11)-S(11)-Ru | 87.41(8)  |
| C(23)-N(13) | 1.457(3)  | C(11)-S(21)-Ru | 87.95(8)  |
| N(12)-C(12) | 1.346(3)  | C(13)-S(23)-Ru | 87.79(8)  |
| N(12)-C(22) | 1.453(4)  | C(12)-S(22)-Ru | 87.5(1)   |
| N(12)-C(32) | 1.465(4)  | C(13)-S(13)-Ru | 87.48(8)  |
| N(13)-C(33) | 1.460(3)  | C(12)-S(12)-Ru | 87.2(1)   |

**Table S2.** Selected bond lengths (Å) and angles (°) for [Ru(PDT)<sub>3</sub>] $\cdot$ CHCl<sub>3</sub>.

|             |          |                |           |
|-------------|----------|----------------|-----------|
| Ru-S(22)    | 2.373(1) | S(22)-Ru-S(23) | 92.98(4)  |
| Ru-S(23)    | 2.375(1) | S(22)-Ru-S(21) | 91.78(4)  |
| Ru-S(21)    | 2.390(1) | S(23)-Ru-S(21) | 94.44(4)  |
| Ru-S(11)    | 2.392(1) | S(22)-Ru-S(11) | 100.68(4) |
| Ru-S(12)    | 2.396(1) | S(23)-Ru-S(11) | 161.66(4) |
| Ru-S(13)    | 2.410(1) | S(21)-Ru-S(11) | 73.13(4)  |
| S(21)-C(11) | 1.711(4) | S(22)-Ru-S(12) | 73.29(4)  |
| S(13)-C(13) | 1.722(4) | S(23)-Ru-S(12) | 100.14(4) |
| S(11)-C(11) | 1.717(4) | S(21)-Ru-S(12) | 159.54(4) |
| S(12)-C(12) | 1.724(4) | S(11)-Ru-S(12) | 95.51(4)  |
| S(22)-C(12) | 1.708(4) | S(22)-Ru-S(13) | 163.18(4) |
| S(23)-C(13) | 1.705(4) | S(23)-Ru-S(13) | 73.00(4)  |
| N(12)-C(12) | 1.318(5) | S(21)-Ru-S(13) | 98.40(4)  |
| N(12)-C(22) | 1.453(5) | S(11)-Ru-S(13) | 95.09(4)  |
| N(12)-C(52) | 1.471(5) | S(12)-Ru-S(13) | 99.55(4)  |
| N(11)-C(11) | 1.321(5) | C(11)-S(21)-Ru | 87.3(1)   |
| N(11)-C(21) | 1.471(5) | C(13)-S(13)-Ru | 86.4(1)   |
| N(11)-C(51) | 1.473(5) | C(11)-S(11)-Ru | 87.1(1)   |
| N(13)-C(13) | 1.316(5) | C(12)-S(12)-Ru | 86.5(1)   |
| N(13)-C(23) | 1.457(5) | C(12)-S(22)-Ru | 87.6(1)   |
| N(13)-C(53) | 1.481(5) | C(13)-S(23)-Ru | 87.9(1)   |
| C(23)-C(33) | 1.506(6) |                |           |
| C(52)-C(42) | 1.506(6) |                |           |
| C(32)-C(22) | 1.518(6) |                |           |
| C(32)-C(42) | 1.523(6) |                |           |
| C(53)-C(43) | 1.498(7) |                |           |
| C(51)-C(41) | 1.502(6) |                |           |
| C(41)-C(31) | 1.462(7) |                |           |
| C(21)-C(31) | 1.536(6) |                |           |
| C(33)-C(43) | 1.470(7) |                |           |

**Table S3.** Selected bond lengths (Å) and angles (°) for [Ru(ESDT)<sub>3</sub>].

|             |          |                |           |
|-------------|----------|----------------|-----------|
| Ru-S(1)     | 2.365(2) | S(1)-Ru-S(1)#1 | 100.5(1)  |
| Ru-S(2)     | 2.369(2) | S(1)-Ru-S(2)   | 72.78(9)  |
| Ru-S(3)     | 2.371(3) | S(1)-Ru-S(2)#1 | 95.16(9)  |
| S(1)-C(11)  | 1.677(9) | S(2)-Ru-S(2)#1 | 161.4(1)  |
| S(2)-C(11)  | 1.726(8) | S(1)-Ru-S(3)   | 95.2(1)   |
| N(11)-C(11) | 1.33(1)  | S(1)#1-Ru-S(3) | 160.15(9) |
| N(11)-C(31) | 1.39(1)  | S(2)-Ru-S(3)   | 101.11(9) |
| N(11)-C(21) | 1.41(2)  | S(1)-Ru-S(3)#1 | 160.15(9) |
| C(31)-C(41) | 1.54(2)  | S(2)-Ru-S(3)#1 | 93.85(9)  |
| O(11)-C(41) | 1.20(2)  | S(3)-Ru-S(3)#1 | 72.6(2)   |
| C(41)-O(21) | 1.31(2)  | C(11)-S(1)-Ru  | 88.6(3)   |
| O(21)-C(61) | 1.49(2)  |                |           |
| O(21)-C(51) | 1.54(2)  |                |           |
| C(51)-C(71) | 1.53(2)  |                |           |
| C(61)-C(81) | 1.51(2)  |                |           |
| S(3)-C(12)  | 1.685(6) |                |           |
| C(12)-N(12) | 1.38(2)  |                |           |
| N(12)-C(22) | 1.49(2)  |                |           |
| N(12)-C(32) | 1.56(3)  |                |           |
| C(32)-C(42) | 1.60(2)  |                |           |
| O(12)-C(42) | 1.26(2)  |                |           |
| O(22)-C(42) | 1.36(3)  |                |           |
| O(22)-C(52) | 1.48(2)  |                |           |
| C(52)-C(62) | 1.50(2)  |                |           |

Symmetry code #1 = x,-y,-z+1/2.

**Table S4.** UV-visible spectral data for BSA in the presence of dimethyl sulfoxide (dmsO), [Ru(ESDT)<sub>3</sub>] and  $\alpha$ -[Ru<sub>2</sub>(ESDT)<sub>5</sub>]Cl complexes in phosphate buffered saline solution.

| BSA : complex<br>(% v/v of dmsO)                             | $\lambda_{\text{max}}$ in nm |               |               |               |               |
|--------------------------------------------------------------|------------------------------|---------------|---------------|---------------|---------------|
|                                                              | without<br>dmsO              | 5:1<br>0.02 % | 1:1<br>0.10 % | 1:2<br>0.19 % | 1:5<br>0.48 % |
| BSA + dmsO                                                   | 208                          | 219           | 224.4         | 227.2         | 230           |
| BSA +<br>[Ru(ESDT) <sub>3</sub> ]                            | –                            | 220           | 227.2         | 227.6         | 230           |
| BSA + $\alpha$ -<br>[Ru <sub>2</sub> (ESDT) <sub>5</sub> ]Cl | –                            | 219.2         | 225.2         | 227.6         | 230           |

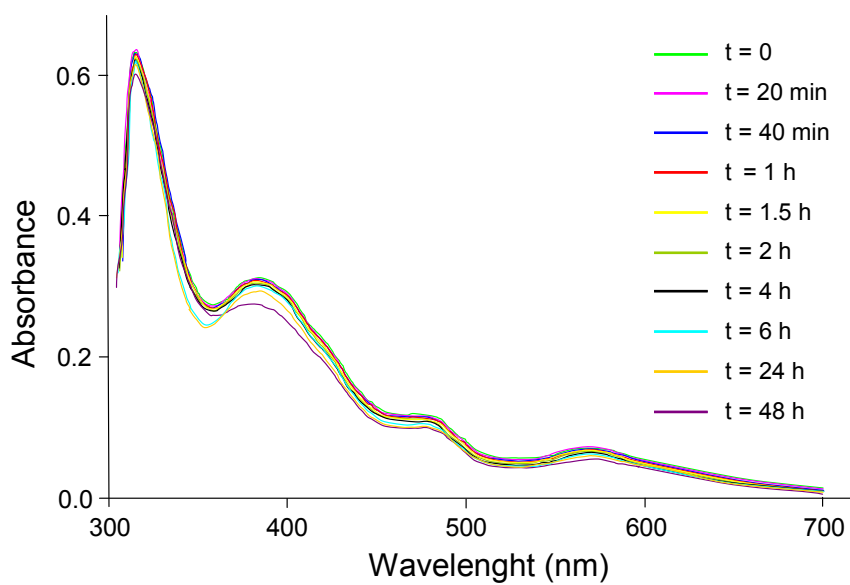

**Figure S1.** UV-visible spectra of [Ru(ESDT)<sub>3</sub>] in DMEM growth medium / 0.5 % (v/v) dimethyl sulfoxide at room temperature followed for 48 h,  $c_{\text{complex}} = 2.3 \cdot 10^{-5} \text{ mol} \cdot \text{dm}^{-3}$ .

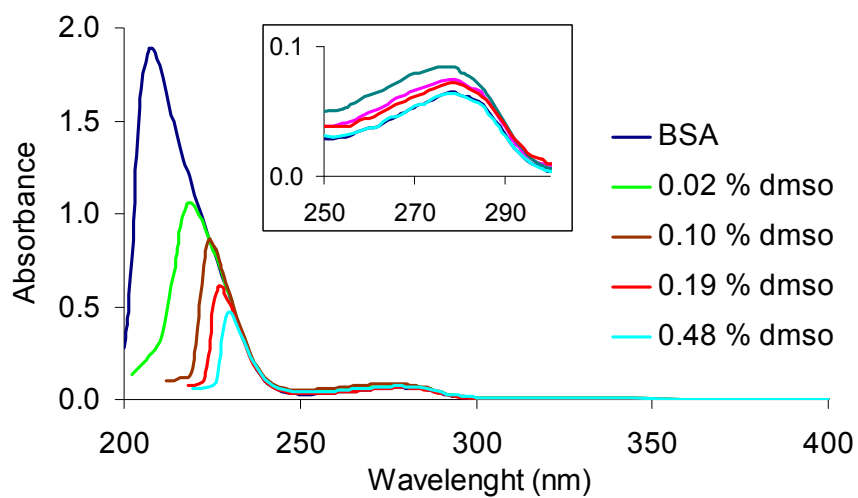

**Figure S2.** UV-visible spectra of BSA in phosphate buffered saline with dimethyl sulfoxide (dmsu) at room temperature,  $c_{\text{BSA}} = 1.4 \cdot 10^{-6} \text{ mol} \cdot \text{dm}^{-3}$ .

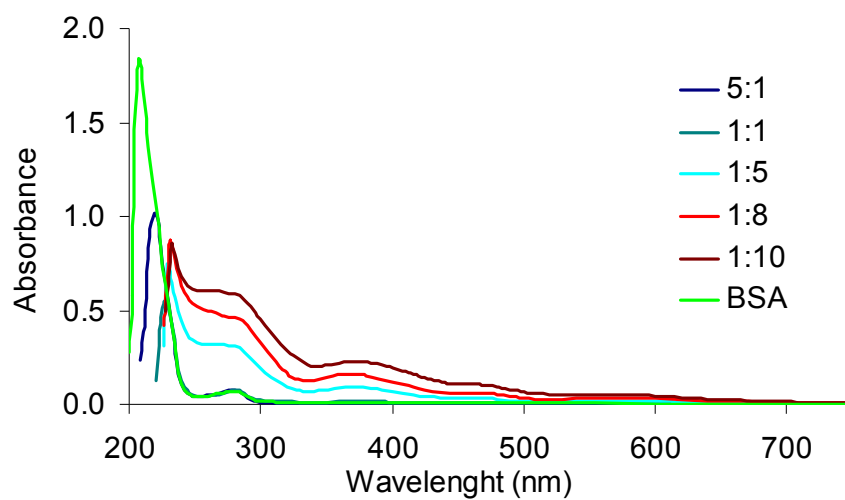

**Figure S3.** UV-visible spectra of [Ru(ESDT)<sub>3</sub>] in phosphate buffered saline with BSA / 0.5 % (v/v) dimethyl sulfoxide at room temperature,  $c_{\text{BSA}} = 1.4 \cdot 10^{-6} \text{ mol} \cdot \text{dm}^{-3}$ , with different BSA:complex ratios.



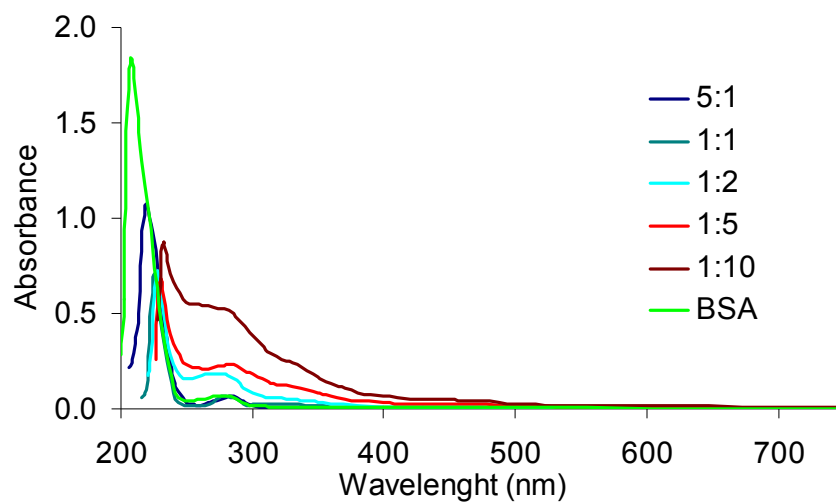

**Figure S4.** UV-visible spectra of  $\alpha$ -[Ru<sub>2</sub>(ESDT)<sub>5</sub>]Cl in phosphate buffered saline with BSA / 0.5 % (v/v) dimethyl sulfoxide at room temperature,  $c_{\text{BSA}} = 1.4 \cdot 10^{-6} \text{ mol} \cdot \text{dm}^{-3}$ , with different BSA:complex ratios.

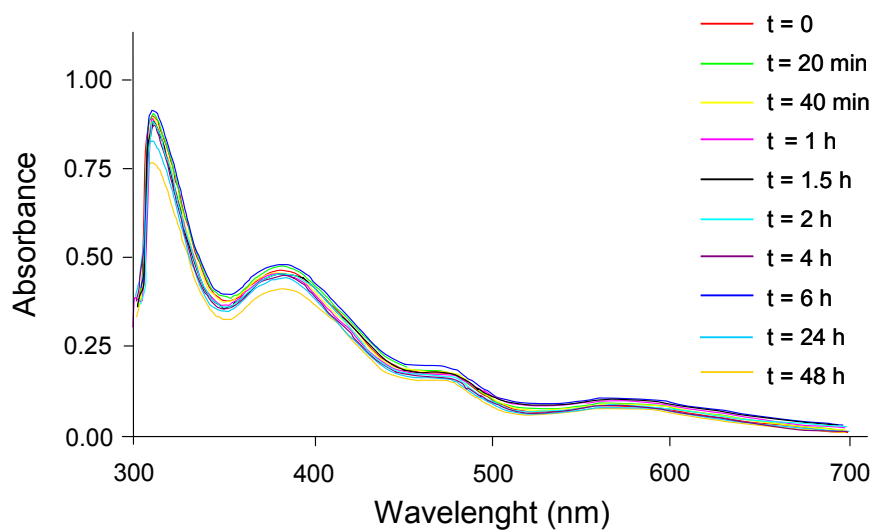

**Figure S5.** UV-visible spectra of [Ru(ESDT)<sub>3</sub>] in phosphate buffered saline with BSA at room temperature,  $c_{\text{BSA}} = 1.4 \cdot 10^{-4} \text{ mol} \cdot \text{dm}^{-3}$ , BSA:complex 5:1, followed for 48 h.

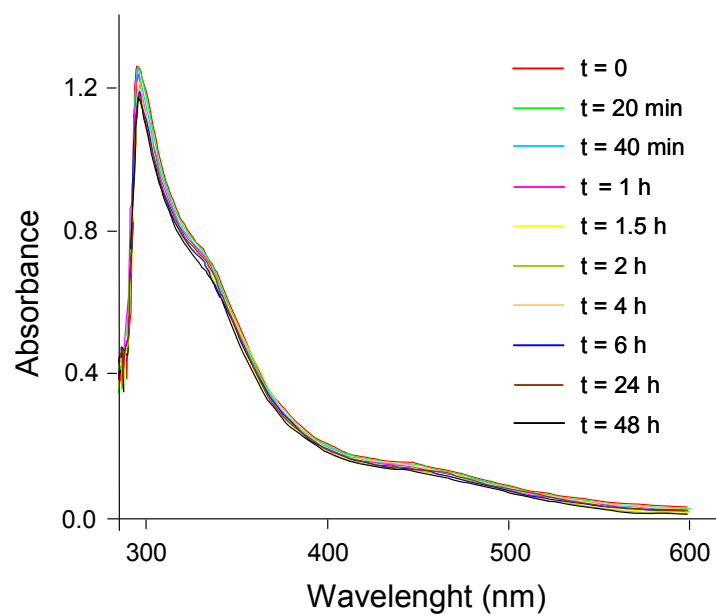

**Figure S6.** UV-visible spectra of  $\alpha$ -[Ru<sub>2</sub>(ESDT)<sub>5</sub>]Cl in phosphate buffered saline with BSA at room temperature,  $c_{\text{BSA}} = 1.4 \cdot 10^{-4} \text{ mol} \cdot \text{dm}^{-3}$ , BSA:complex 5:1, followed for 48 h.

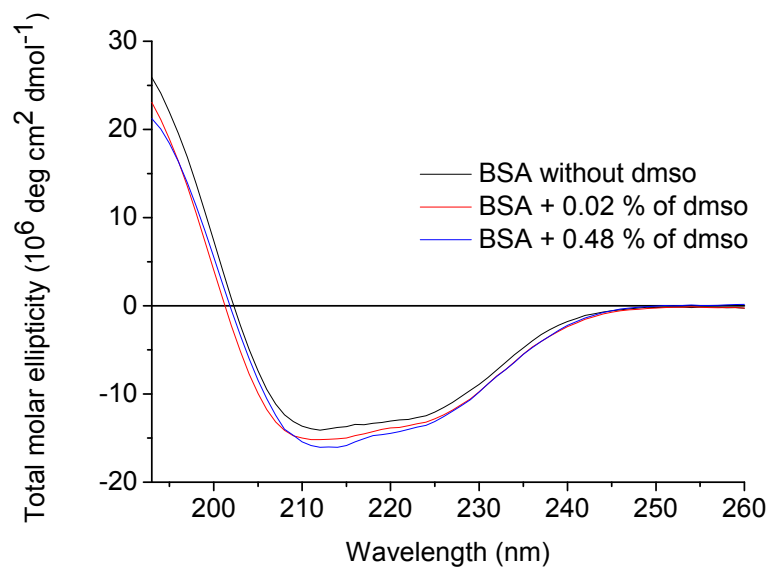

**Figure S7.** CD spectra of BSA in phosphate buffered saline with dimethyl sulfoxide (dms) at room temperature,  $c_{\text{BSA}} = 1.4 \cdot 10^{-6} \text{ mol} \cdot \text{dm}^{-3}$ .

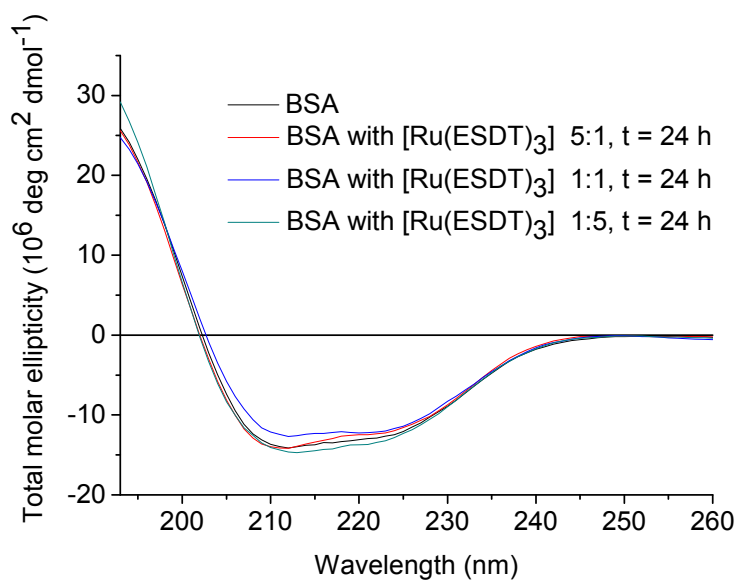

**Figure S8.** CD spectra of BSA in phosphate buffered saline with [Ru(ESDT)<sub>3</sub>] at room temperature, 24 h after the admixture,  $c_{\text{BSA}} = 1.4 \cdot 10^{-6} \text{ mol} \cdot \text{dm}^{-3}$ .

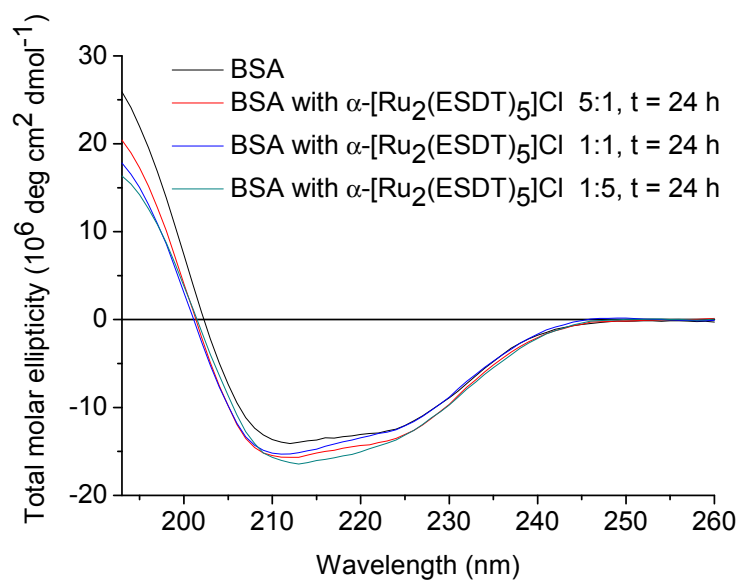

**Figure S9.** CD spectra of BSA in phosphate buffered saline with  $\alpha$ -[Ru<sub>2</sub>(ESDT)<sub>5</sub>]Cl at room temperature, 24 h after the admixture,  $c_{\text{BSA}} = 1.4 \cdot 10^{-6} \text{ mol} \cdot \text{dm}^{-3}$ .
